# Supplementary material for: Supramolecular tryptophan-zipper forms a tripeptide as a regular proton transporter
Source: Royal Society of Chemistry journal article supplement (doi:10.1039/c5ce02005k), 2016-01-01
Supplement: c5ce02005k1.pdf [file c5ce02005k1.pdf]

## Supplementary Information

### Supramolecular tryptophan-zipper form a tripeptide as regular proton transporter

Debasish Podder, Supriya Sasmal, Krishnendu Maji and Debasish Haldar\*

Department of Chemical Sciences, Indian Institute of Science Education and Research  
Kolkata, Mohanpur, West Bengal 741246, India.

Fax: +913325873020; Tel: +913325873119;

E-mail: [deba\\_h76@yahoo.com](mailto:deba_h76@yahoo.com); [deba\\_h76@iiserkol.ac.in](mailto:deba_h76@iiserkol.ac.in)

#### Table of contents

|              |   |            |    |
|--------------|---|------------|----|
| ESI Figure 1 | 2 | Figure S4  | 9  |
| ESI Figure 2 | 3 | Figure S5  | 9  |
| ESI Figure 3 | 4 | Figure S6  | 10 |
| ESI Figure 4 | 5 | Figure S7  | 10 |
| ESI Figure 5 | 5 | Figure S8  | 11 |
| ESI Figure 6 | 6 | Figure S9  | 11 |
| Scheme 1     | 6 | Figure S10 | 12 |
| Figure S1    | 7 | Figure S11 | 12 |
| Figure S2    | 7 | Figure S12 | 13 |
| Figure S3    | 8 | Figure S13 | 13 |

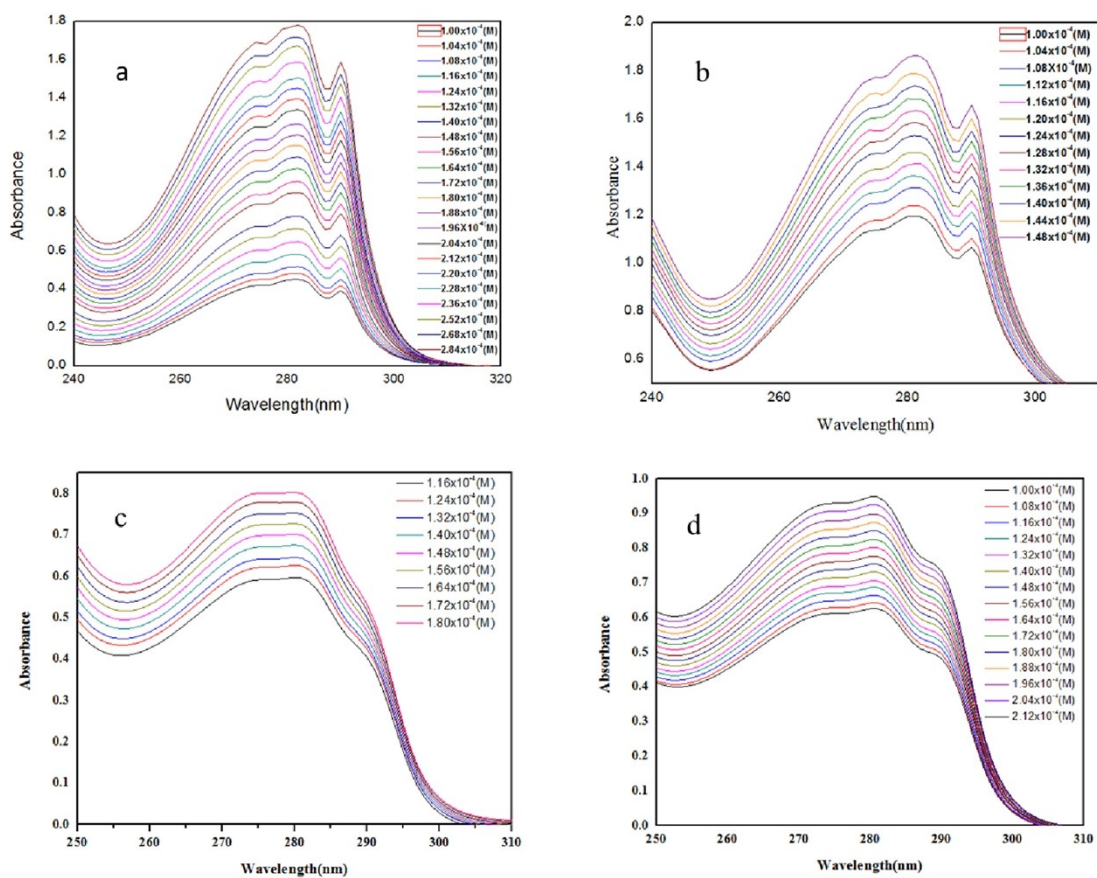

**ESI Figure 1.** UV-Vis absorption spectra of (a) peptide 1 in methanol (b) peptide 2 in methanol (c) peptide 1 in chloroform and (d) peptide 2 in chloroform.

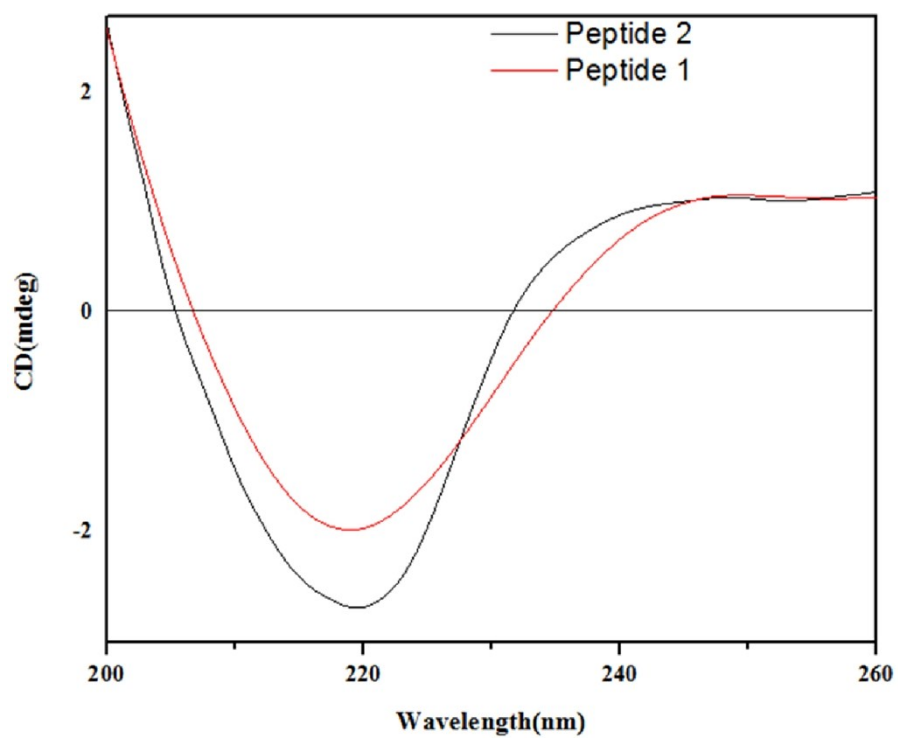

**ESI Figure 2.** The CD spectra of tripeptides **1** and **2** in methanol.

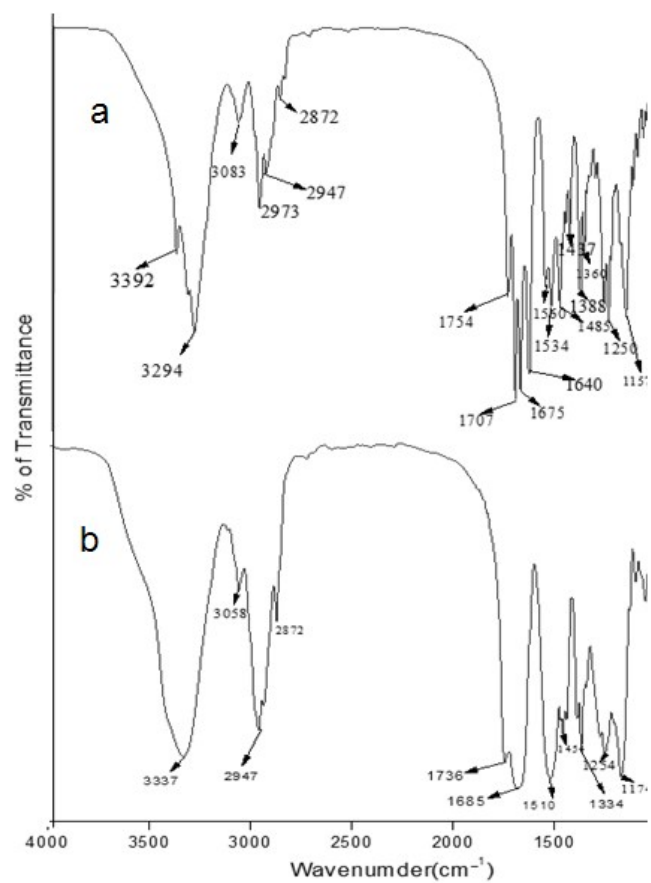

**ESI Figure 3.** The solid state FT-IR spectra of (a) Peptide 1 and (b) Peptide 2.

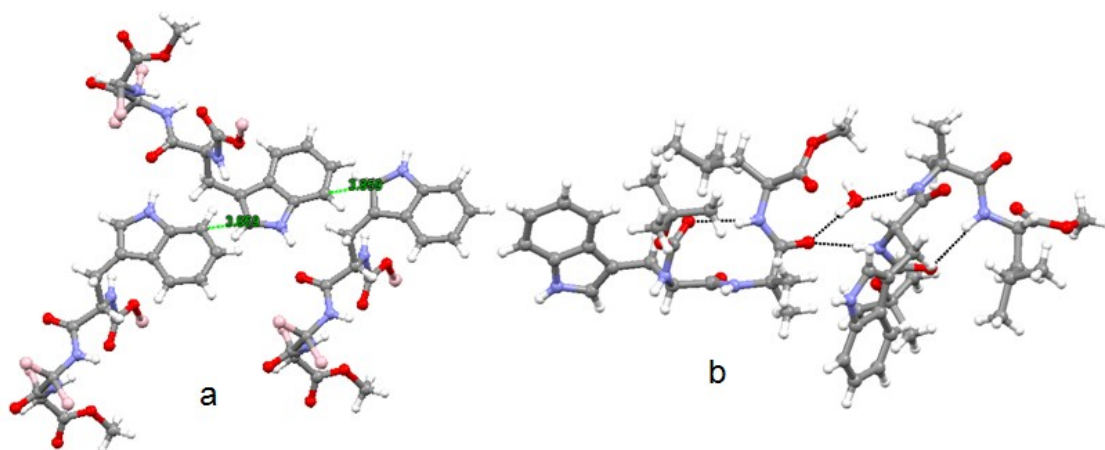

**ESI Figure 4.** The self-assembly of (a) tripeptide **1** through  $\pi$ - $\pi$  interactions and (b) tripeptide **2** through intermolecular hydrogen bonding interactions.

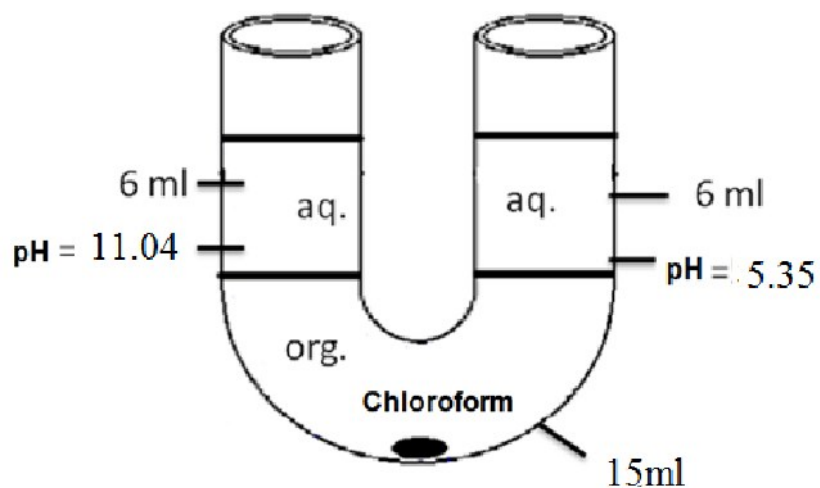

**ESI Figure 5.** U-tube experiment setup for the determination of proton transport rates under pH gradients.

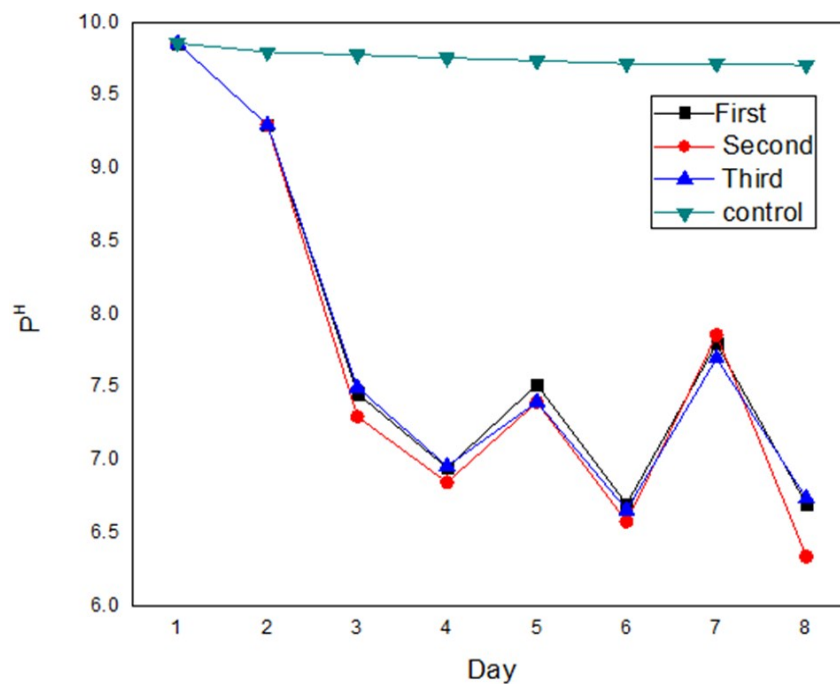

**ESI Figure 6.** The proton transport ability of the tripeptide **2** measured in U-tube experiment using pH gradient as the driving force.

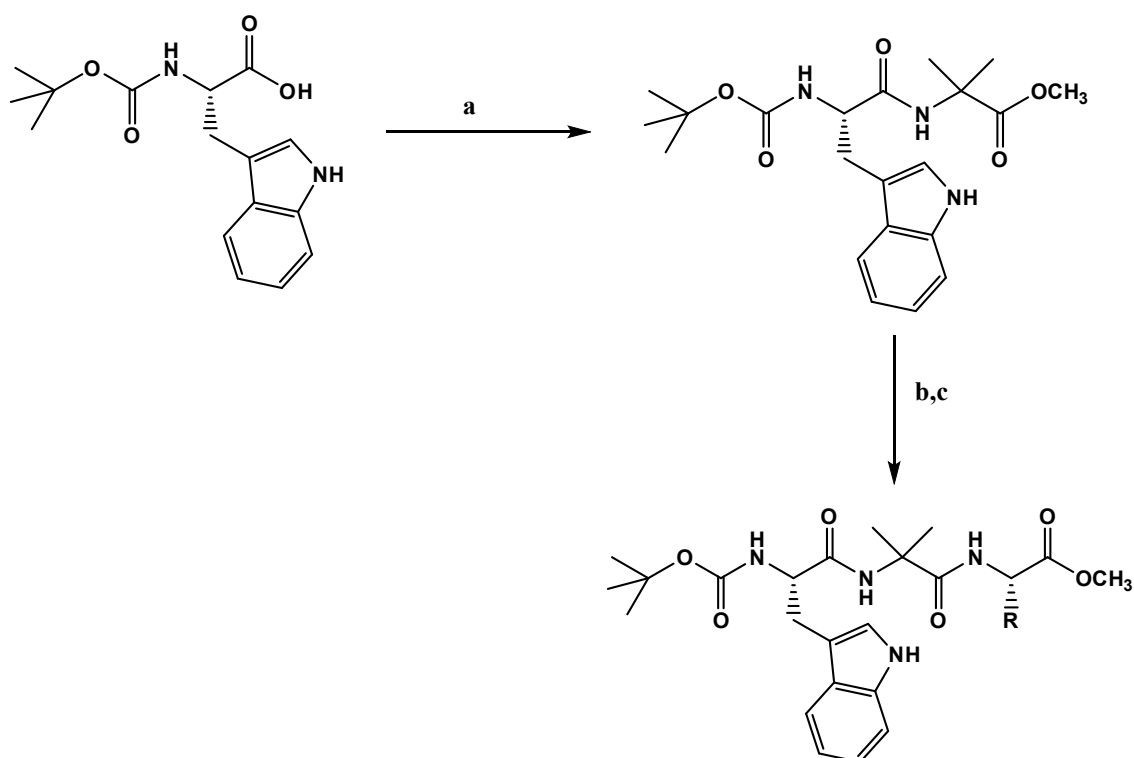

**Scheme 1.** Schematic presentation of synthesis of the tripeptides. Reagents and conditions: (a) DMF, H-Aib-OMe, DCC, HOBT, 0°C, 62% yield; (b) MeOH, 2N NaOH, 62% yield; (c) DCM, H-Val-OMe(1)/ H-Leu-OMe(2), DCC, HOBT, 0°C.

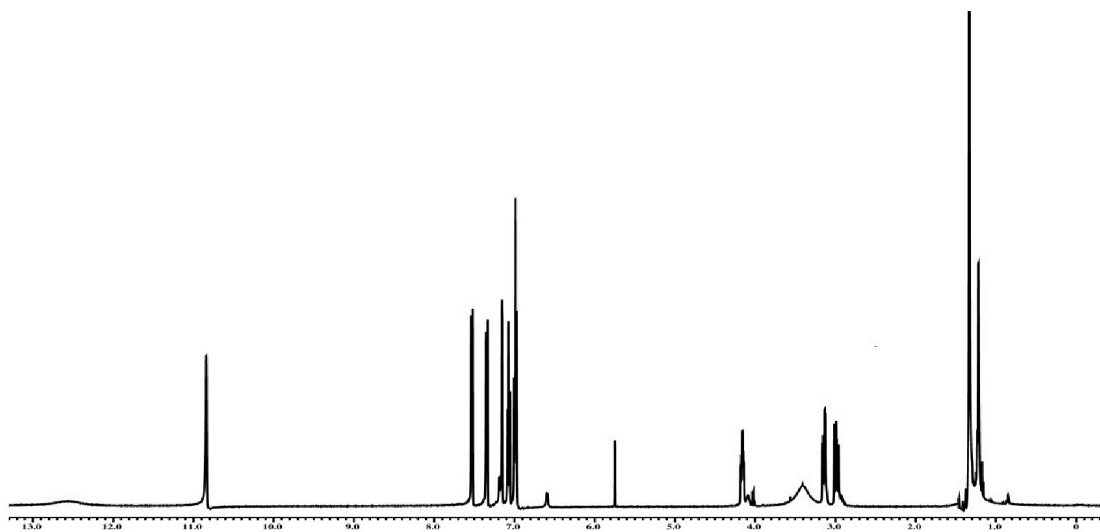

**Fig S1:**  $^1\text{H}$  NMR (500MHz,  $\text{DMSO-}d_6$ ,  $\delta$  in ppm) spectra of Boc-Trp-OH.

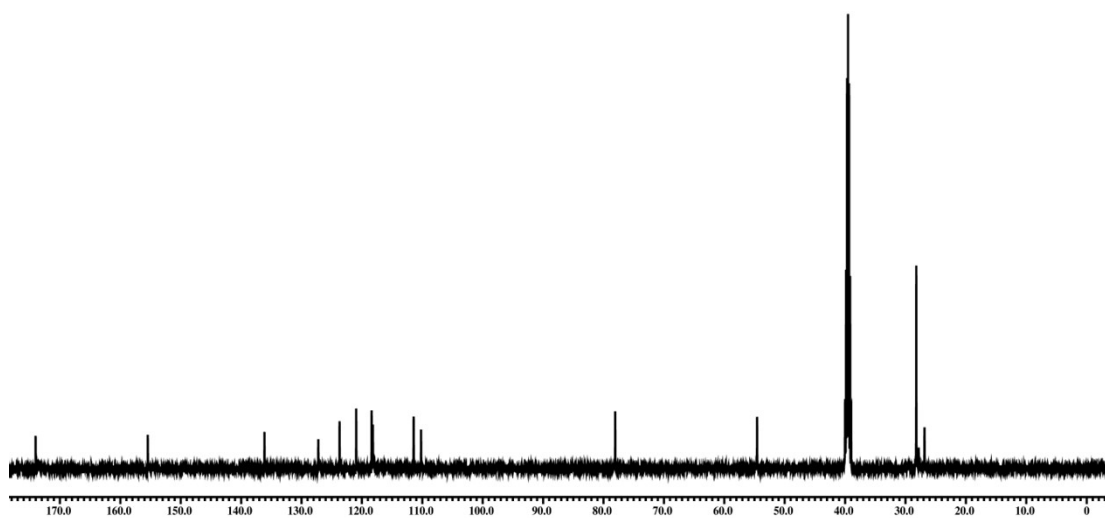

**Fig S2:**  $^{13}\text{C}$  NMR (125 MHz,  $\text{DMSO-}d_6$ ,  $\delta$  in ppm) spectra of Boc-Trp-OH.

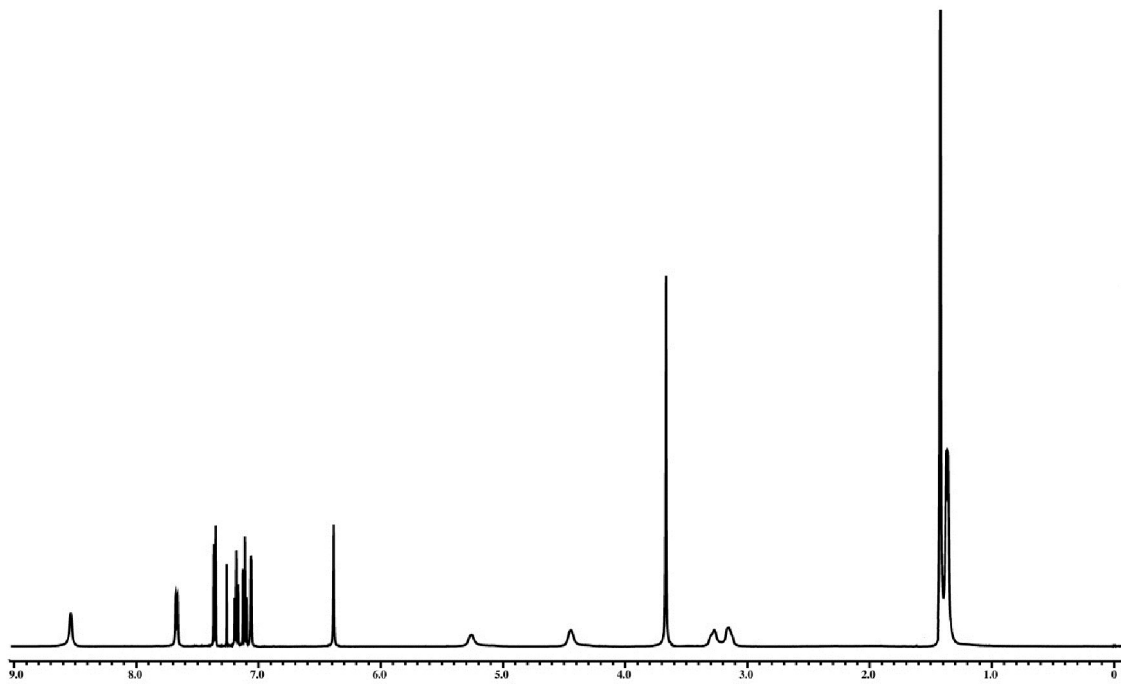

**Fig S3:**  $^1\text{H}$  NMR (400 MHz,  $\text{CDCl}_3$ ,  $\delta$  in ppm) spectra of Boc-Trp-Aib-OMe.



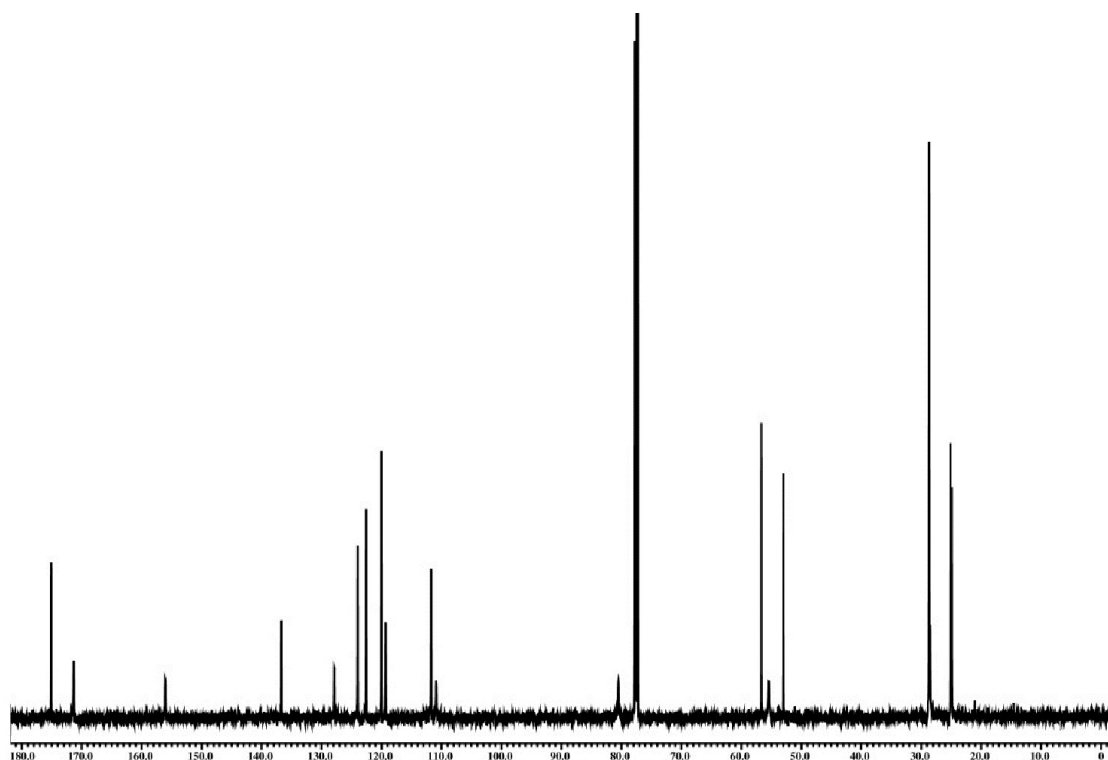

**Fig S4 :**  $^{13}\text{C}$  NMR (100 MHz,  $\text{CDCl}_3$ ,  $\delta$  in ppm) spectra of Boc-Trp-Aib-OMe.

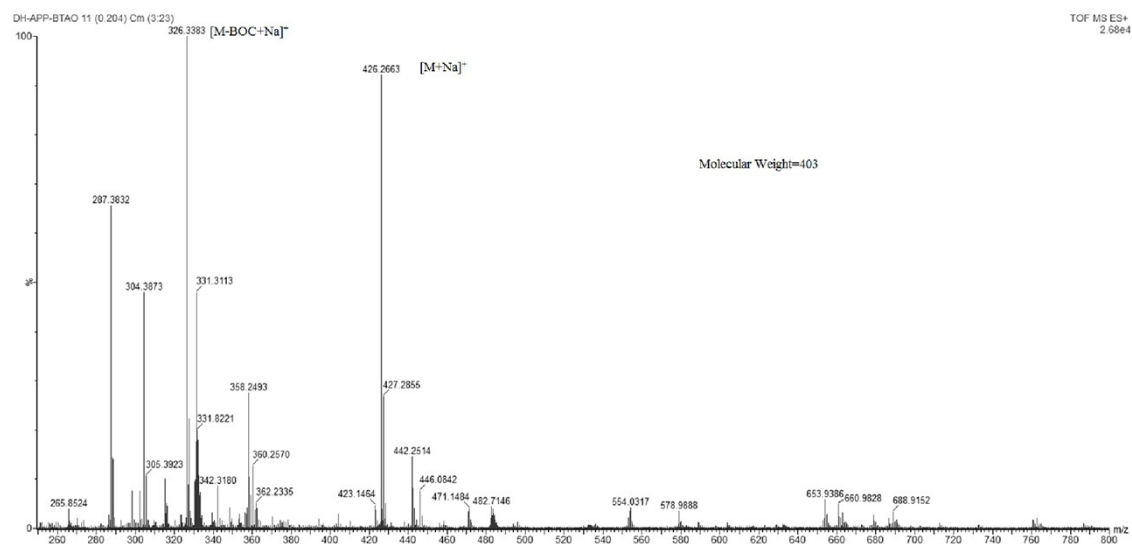

**Fig S5:** Mass Spectra of Boc-Trp-Aib OMe

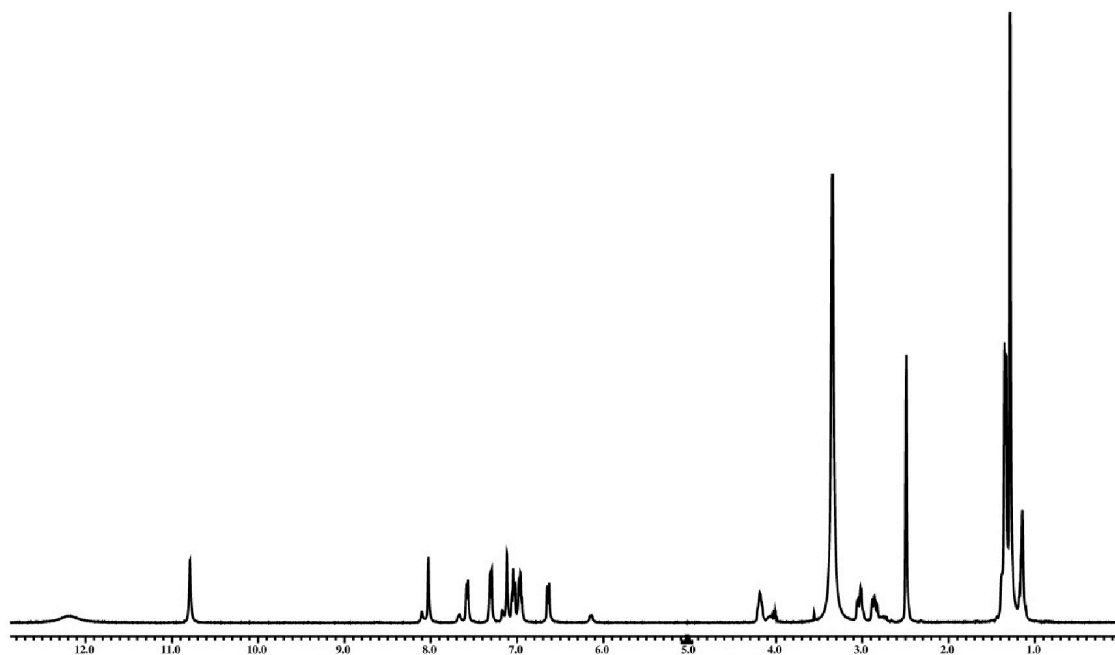

**Fig S6:**  $^1\text{H}$  NMR (400 MHz,  $\text{DMSO-}d_6$ ,  $\delta$  in ppm) spectra of Boc-Trp-Aib-OH.

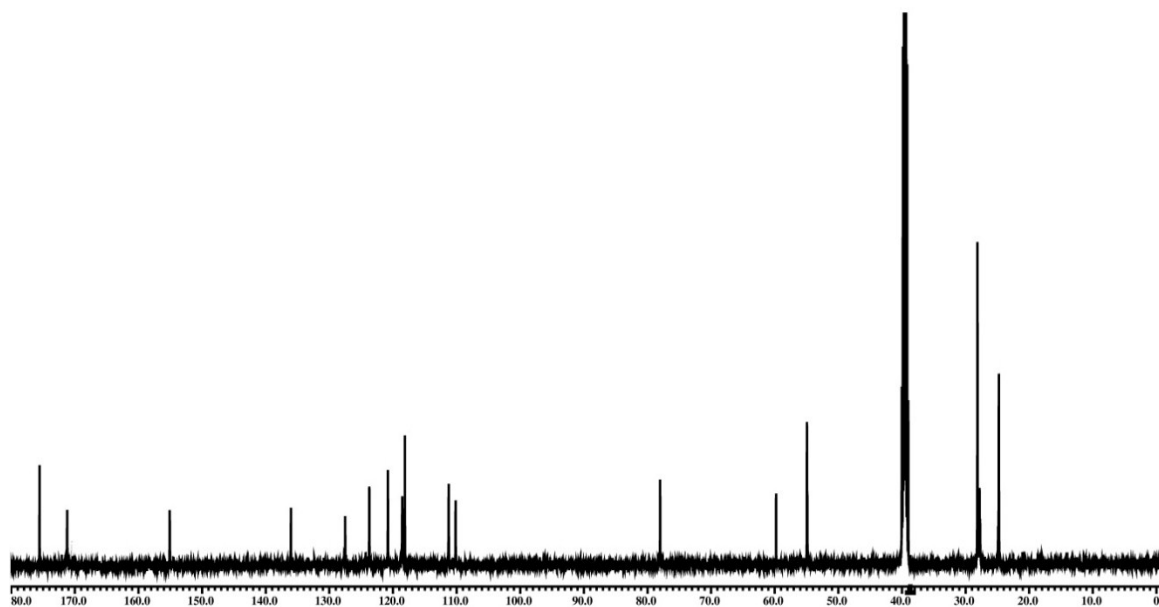

**Fig S7:**  $^{13}\text{C}$  NMR (125 MHz,  $\text{DMSO-}d_6$ ,  $\delta$  in ppm) spectra of Boc-Trp-Aib-OH.

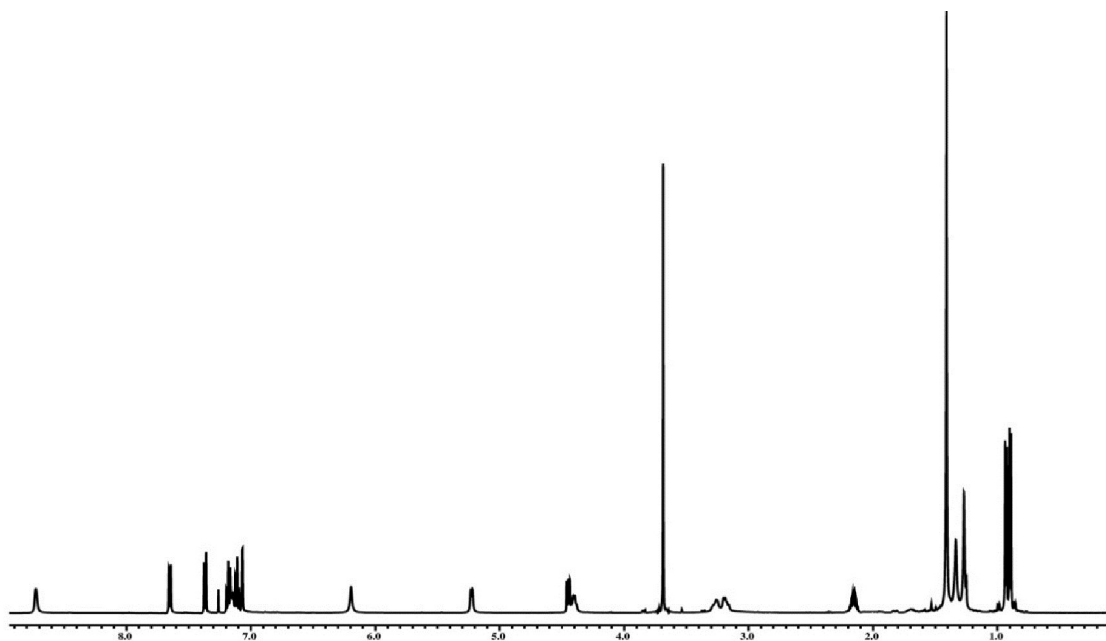

**Fig S8:** <sup>1</sup>H NMR (400 MHz, CDCl<sub>3</sub>, δ in ppm) spectra of Boc-Trp-Aib-Val-OMe 1.

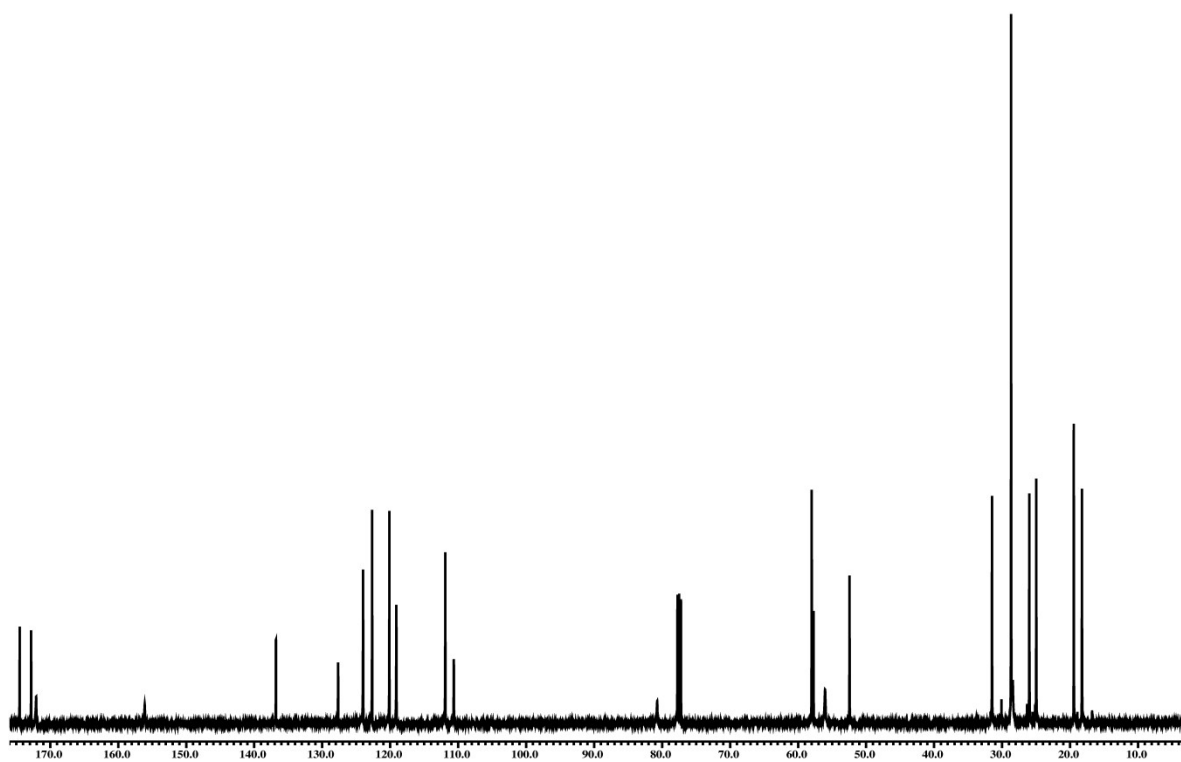

**Fig S9:** <sup>13</sup>C NMR (100 MHz, CDCl<sub>3</sub>, δ in ppm) spectra of Boc-Trp-Aib-Val-OMe 1.

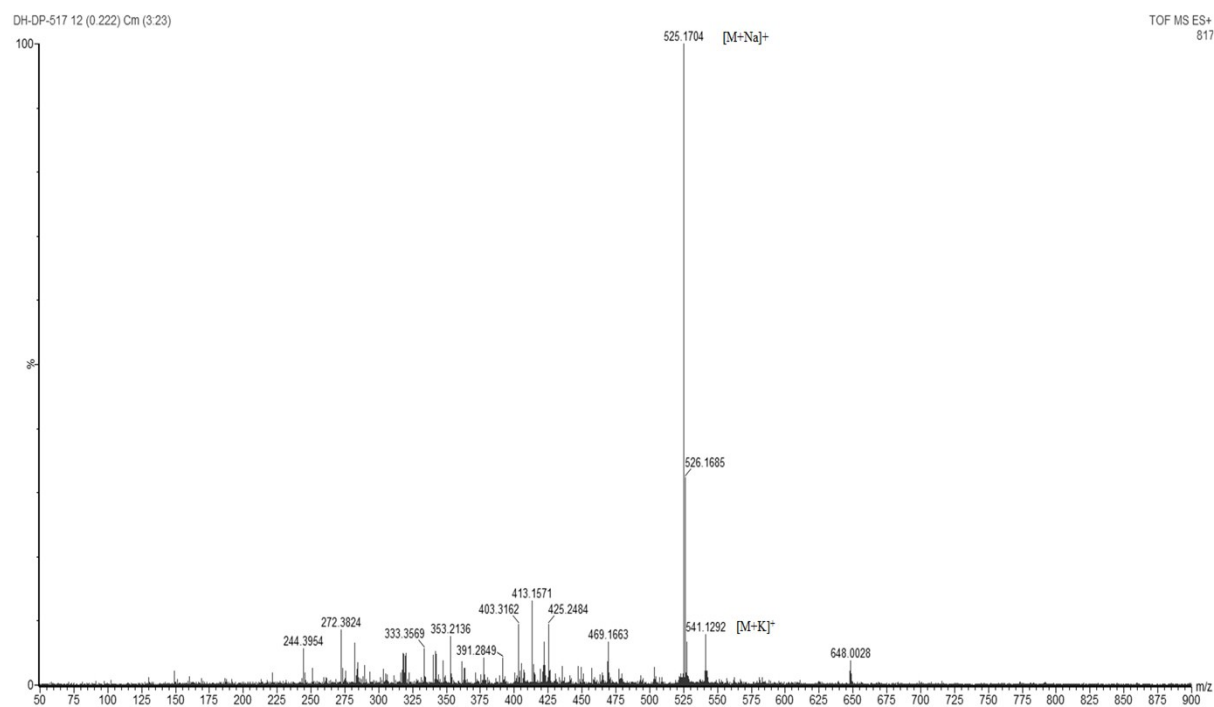

**Fig S10:** Mass Spectra of Boc-Trp-Aib-Val-OMe 1.

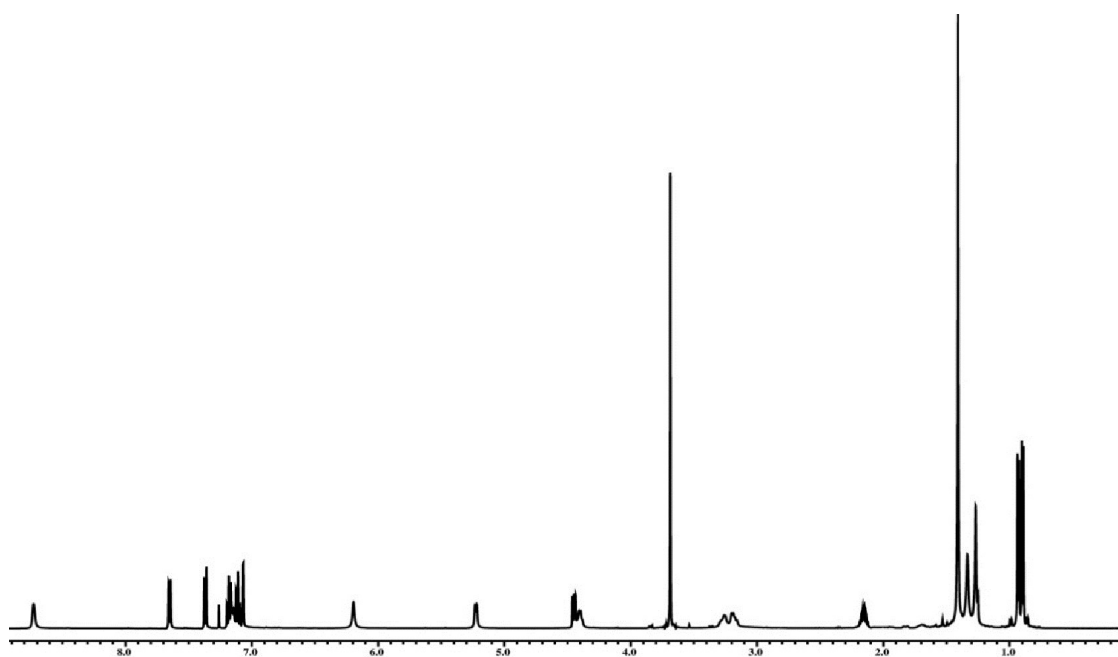

**Fig S11:**  $^1\text{H}$  NMR (400 MHz,  $\text{CDCl}_3$ ,  $\delta$  in ppm) spectra of Boc-Trp-Aib-Leu-OMe 2.

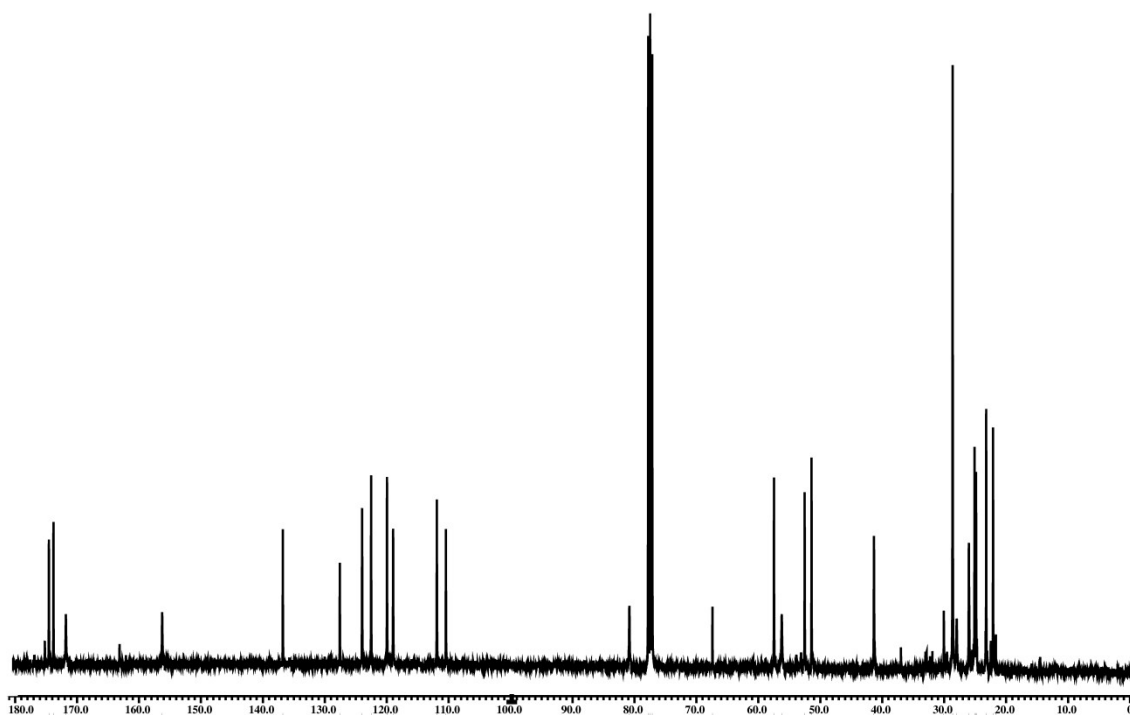

**Fig S12:**  $^{13}\text{C}$  NMR (100 MHz,  $\text{CDCl}_3$ ,  $\delta$  in ppm) spectra of Boc-Trp-Aib-Leu-OMe 2.

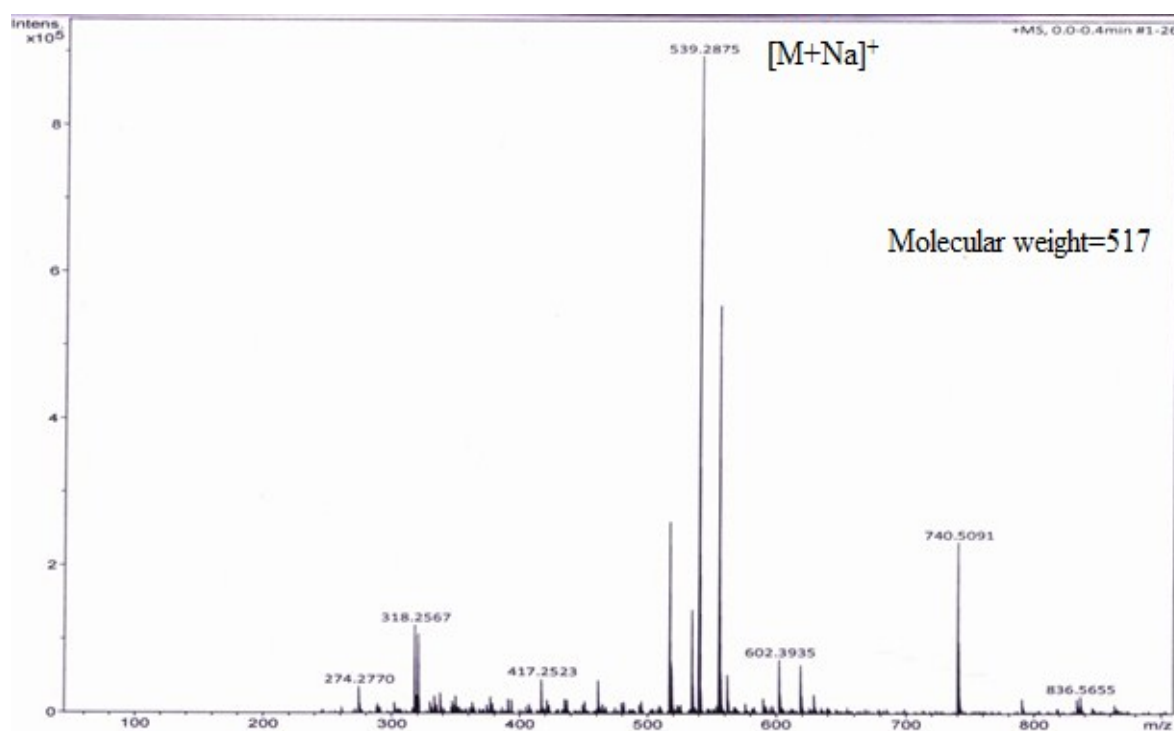

**Fig S13:** Mass Spectra of Boc-Trp-Aib-Leu-OMe 2.
